# Supplementary material for: Improved Neutralisation of the SARS-CoV-2 Omicron Variant following a Booster Dose of Pfizer-BioNTech (BNT162b2) COVID-19 Vaccine
Source: MDPI journal article supplement (doi:10.3390/v14092023), 2022-09-13
Supplement: s1 [file s1]

# Improved Neutralisation of the SARS-CoV-2 Omicron Variant Following a Booster Dose of Pfizer-BioNTech (BNT162b2) COVID-19 Vaccine

Kerri Basile <sup>1,\*</sup>, Rebecca J Rockett <sup>2,3</sup>, Kenneth McPhie <sup>1,4</sup>, Michael Fennell <sup>1</sup>, Jessica Johnson-Mackinnon <sup>2</sup>, Jessica E Agius <sup>2</sup>, Winkie Fong <sup>2</sup>, Hossinur Rahman <sup>1</sup>, Danny Ko <sup>1</sup>, Linda Donavan <sup>1</sup>, Linda Hueston <sup>1,5</sup>, Connie Lam <sup>2</sup>, Alicia Arnott <sup>1</sup>, Sharon C-A Chen <sup>1,2,3</sup>, Susan Maddocks <sup>1</sup>, Matthew V O'Sullivan <sup>1,2,3</sup>, Dominic E Dwyer <sup>1,2,3</sup>, Vitali Sintchenko <sup>1,2,3</sup> and Jen Kok <sup>1,2,\*</sup>

*Table S1. Study Participant Demographic and In-house SARS-CoV-2 Immunofluorescence (IFA) and Neutralising Antibody Titres (nAbT)*

| Sera | Sex | Age (yrs) | Timing post BNT162b2 (months) | SARS-CoV-2 ELISA |         | SARS-CoV-2 IFA |     |     | Virus Lineage nAbT |       |         |
|------|-----|-----------|-------------------------------|------------------|---------|----------------|-----|-----|--------------------|-------|---------|
|      |     |           |                               | N ratio          | S ratio | IgG            | IgA | IgM | Wildtype           | Delta | Omicron |
| 5    | M   | 65        | 1                             | 0.13             | 12.3    | 320            | <10 | <10 | 40                 | 20    | <10     |
| 3    | M   | 49        | 1                             | 0.5              | 11.87   | 320            | <10 | <10 | 20                 | <10   | <10     |
| 3    | M   | 49        | 3                             | 0.29             | 8.96    | 40             | <10 | <10 | <10                | <10   | <10     |
| 9    | F   | 59        | 1                             | 0.17             | 11.92   | 160            | <10 | <10 | <10                | <10   | <10     |
| 9    | F   | 59        | 3                             | 0.16             | 11.62   | 80             | <10 | <10 | <10                | <10   | <10     |
| 9    | F   | 59        | Booster (1M)                  | 0.14             | 12.3    | 1280           | <10 | <10 | 320                | 320   | 160     |
| 1    | F   | 36        | Naive                         | 0.58             | 0.64    | <10            | <10 | <10 | <10                | <10   | <10     |
| 1    | F   | 36        | 3                             | 0.16             | 12.3    | 80             | <10 | <10 | 40                 | 20    | <10     |
| 14   | F   | 34        | 6                             | NA               | NA      | 80             | <10 | <10 | 20                 | <10   | <10     |
| 14   | F   | 34        | Booster (1M)                  | NA               | NA      | 640            | <10 | <10 | 160                | 160   | 40      |
| 15   | M   | 63        | 6                             | 0.1              | 6       | 40             | <10 | <10 | <10                | <10   | <10     |
| 15   | M   | 63        | Booster (1M)                  | 0.17             | 13      | 640            | 20  | <10 | 160                | 80    | 80      |
| 16   | M   | 59        | 6                             | 0.4              | 7.9     | 40             | <10 | <10 | 20                 | <10   | <10     |
| 16   | M   | 59        | Booster (1M)                  | 1.01             | 10.51   | 160            | 20  | <10 | 320                | 160   | 40      |

**Key:** BNT162b2 – Pfizer-BioNTech (BNT162b2) vaccination; Booster (1M) – 4 weeks after 3rd booster dose of BNT162b2; Delta – Delta (B.1.617.2) lineage; ELISA – Enzyme linked immunosorbent assay; F – female; IFA – Immunofluorescence Assay; IgA – Immunoglobulin A; IgG – Immunoglobulin G; IgM – Immunoglobulin M; M – male; NA – Not available; N – nucleoprotein; nAbT – Neutralising antibody titre; Omicron – Omicron (B.1.1.529) lineage; S – Trimeric Spike; Wild-type – Wildtype (A.2.2) lineage.

*Figure S1. Waning levels of SARS-CoV-2-specific IgG 1, 3 and 6 months following two doses of Pfizer-BioNTech (BNT162b2) which are boosted 4 weeks after the 3rd BNT162b2 dose (booster dose)*

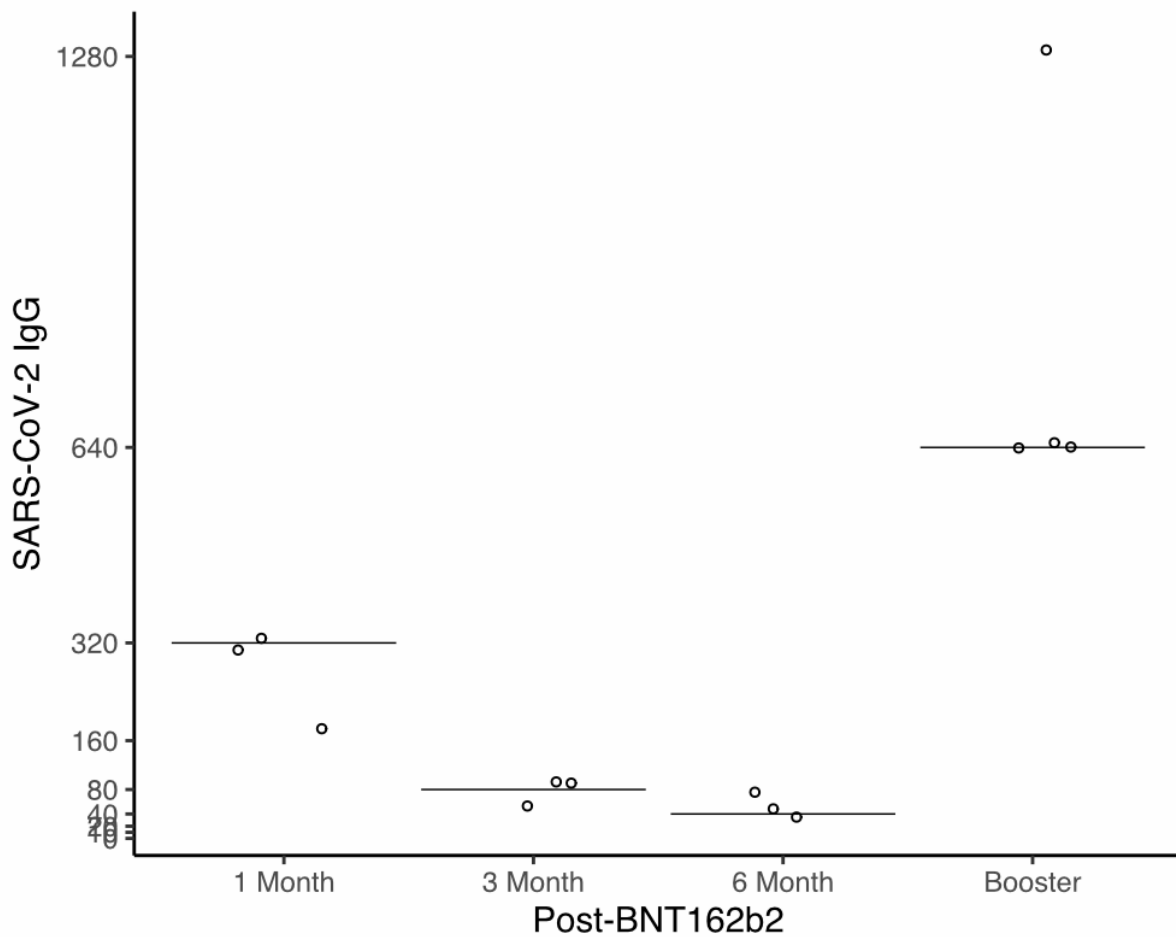

**Figure S1.** Illustrates levels of SARS-CoV-2-specific IgG 1, 3 and 6 months following two doses of Pfizer-BioNTech (BNT162b2) and 4 weeks after the 3rd dose (boosting dose) of BNT162b2. Levels have been determined using an immunofluorescence assay (IFA), black lines depict the median IgG level for each timepoint.

**Figure S2.** Infection kinetics of SARS-CoV-2 lineages propagated in VeroE6/TMPRSS2 cells

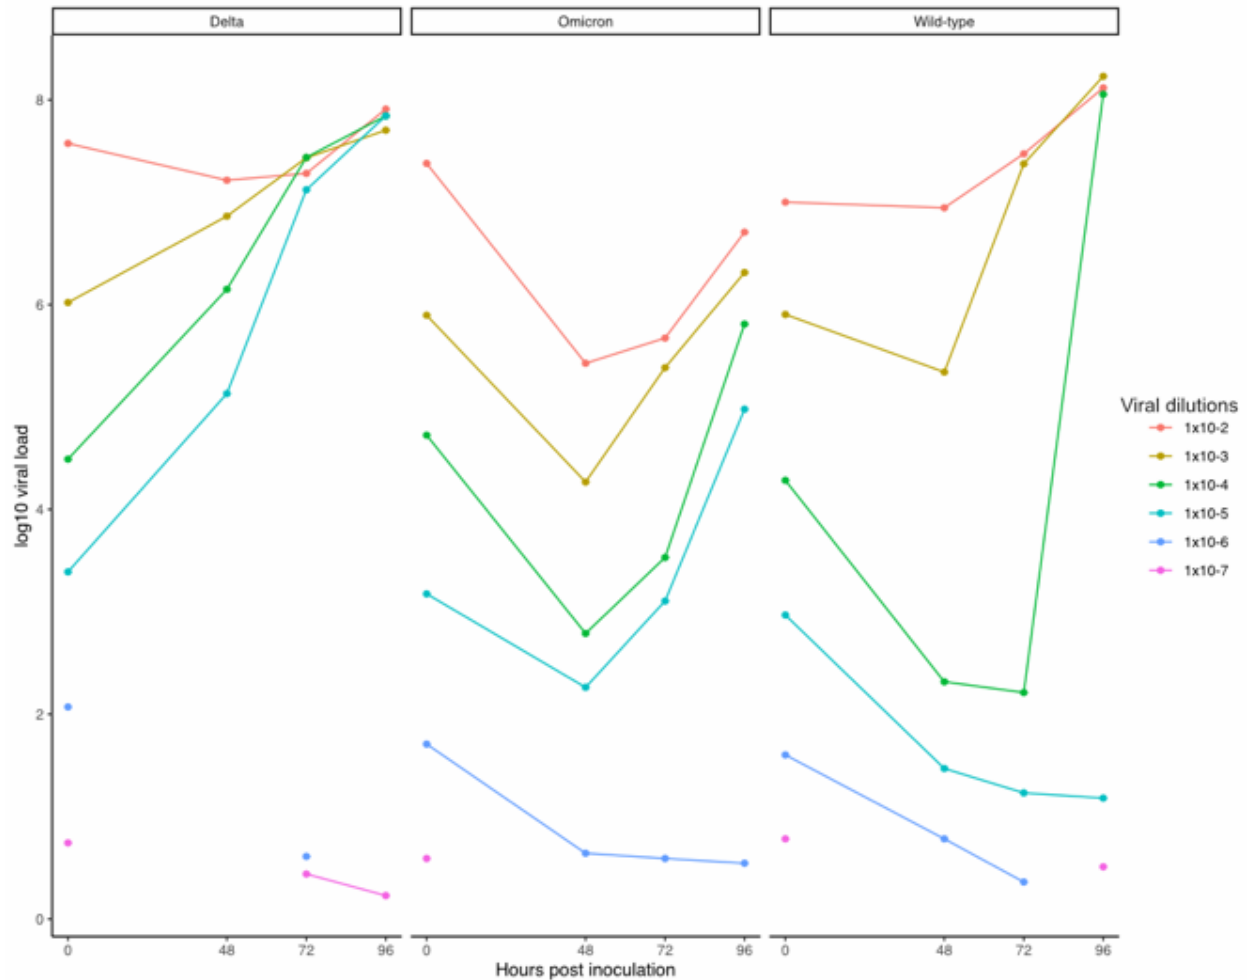

**Figure S2.** Illustrates infection kinetics of SARS-CoV-2 variants propagated in VeroE6/TMPRSS2 cells. Circles represent the viral load of serial dilutions of virus quantified at inoculation, 48, 72 and 96 hrs post-infection determined by SARS-CoV-2 in-house quantitative reverse transcriptase real time polymerase chain reaction (qRT-qPCR) targeting the *N*-gene

**Figure S3.** Change in SARS-CoV-2 viral load 72 hours post-neutralisation with sera collected post- Pfizer-BioNTech (BNT162b2) challenged with SARS-CoV-2 VOCs Delta and Omicron compared to wildtype (lineage A.2.2) virus

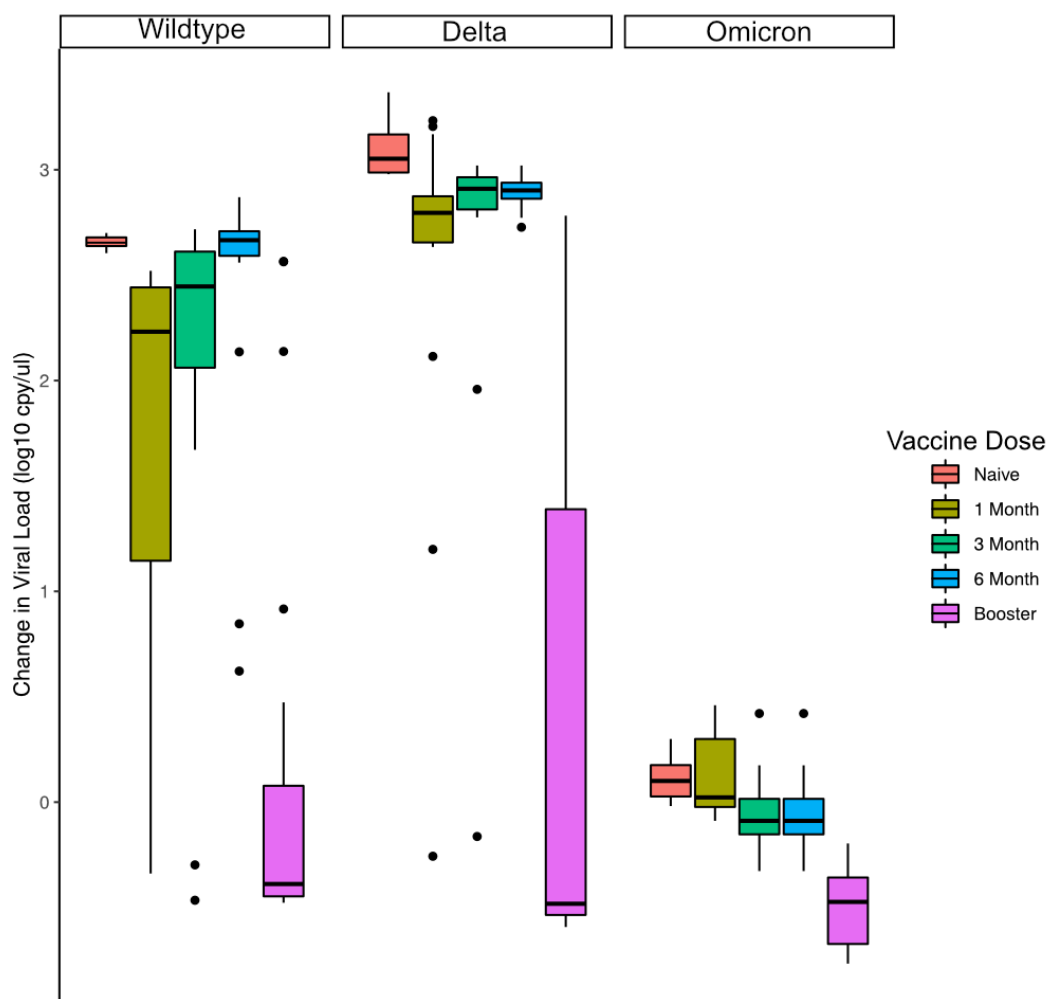

**Figure S3.** Illustrates replication of SARS-CoV-2 variants post-neutralisation when neutralised sera collected at different intervals post- Pfizer-BioNTech (BNT162b2). Results are reported in box-whiskers plots as medians and upper and lower quartiles.

**Table S2: Non-Silent mutations in SARS-CoV-2 isolates used in Micro-neutralisation experiments.**

| <b>SARS-CoV-2 Virus</b> | <b>Non-silent Mutations</b>                                                                                                                                                                                                                                                                                                                                                                                                                                                                                                       | <b>Pango Lineage (GISAID accession)</b> |
|-------------------------|-----------------------------------------------------------------------------------------------------------------------------------------------------------------------------------------------------------------------------------------------------------------------------------------------------------------------------------------------------------------------------------------------------------------------------------------------------------------------------------------------------------------------------------|-----------------------------------------|
| <b>Omicron</b>          | NSP3:K38R, NSP3:S1265(del), NSP3:A1892T, NSP4:T492I, NSP5:P132H, NSP6:L105(del), NSP6:I189V, NSP12b:P314L, NSP14:I42V, S:A67 (del), S:I68 (del), S:T95I, S:G142 (del), S:I210 (ins), S:N211(del), S:G339D, S:S371L, S:S373P, S:S375F, S:K417N, S:N440K, S:G446S, S:S477N, S:T478K, S:E484A, S:Q493R, S:G496S, S:Q498R, S:N501Y, S:Y505H, S:T547K, S:D614G, S:H655Y, S:N679K, S:P681H, S:N764K, S:D796Y*, S:N856K*, S:Q954H, S:N969K, S:L981F, E:T9I, M:D3G, M:Q19E, M:A63T, N:P13L*, N:E31(del)*, N:A134V*, N:RG203KR, ORF10:R24C | BA.1.17<br>(EPI_ISL_7987968)            |
| <b>Delta</b>            | NSP3:H323Y, NSP3:A488S, NSP3:P1228L, NSP3:P1469S, NSP4:V167L, NSP4:T492I, NSP6:T77A, NSP12b:P314L, NSP12b:G662S, NSP13:P77L, NSP14:A394V, NSP16:Q238H, S:T19R, S:T95I*, S:G142D*, S:E156(del), S:L452R, S:T478K, S:D614G, S:P681R, S:D950N, ORF3a:S26L, M:I82T, ORF7a:G70(del), ORF7a:V82A, ORF7a:T120I, ORF7b:T40I, ORF8:D119, N:D63G, N:R203M, N:G215C, N:D377Y                                                                                                                                                                 | AY.39.1<br>(EPI_ISL_3398616)            |
| <b>Wildtype</b>         | NSP4:F308Y, ORF3a:G196V, ORF8:L84S, N:P13L, N:S197L                                                                                                                                                                                                                                                                                                                                                                                                                                                                               | A.2.2<br>(EPI_ISL_427714)               |

\* Missing sequence data over mutations due to mismatches in primer sequences in one of the three SARS-CoV-2 lineages sequenced (Clinical specimen, 96 hrs post viral culture. 72 hrs post-neutralisation).
